# Supplementary material for: Satellite quantification of methane emissions from South American countries: a high-resolution inversion of TROPOMI and GOSAT observations
Source: Copernicus journal article supplement (doi:10.5194/acp-25-797-2025), 2025-01-21
Supplement: Supplementary file 1 [file acp-25-797-2025-supplement.pdf]

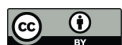

*Supplement of*

## **Satellite quantification of methane emissions from South American countries: a high-resolution inversion of TROPOMI and GOSAT observations**

**Sarah E. Hancock et al.**

*Correspondence to:* Sarah E. Hancock ([sarahhancock@g.harvard.edu](mailto:sarahhancock@g.harvard.edu))

The copyright of individual parts of the supplement might differ from the article licence.

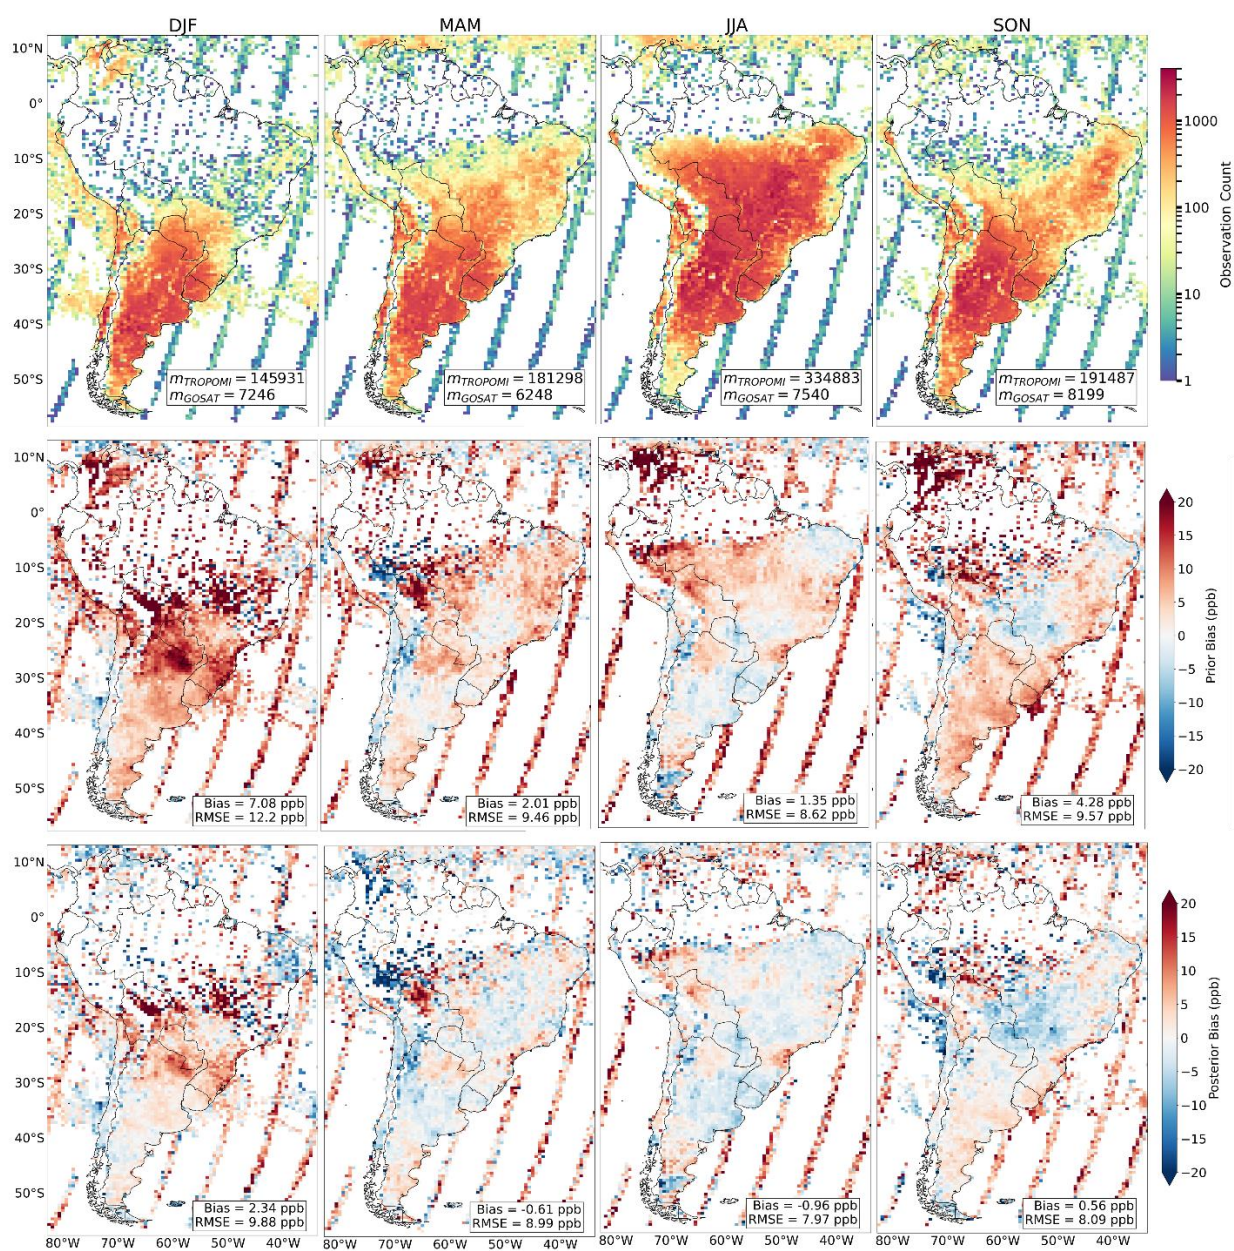

**Figure S1:** Seasonality of the TROPOMI and GOSAT methane data in 2021. The top row shows the number of observations for each season in 2021 shown on a  $0.5^\circ \times 0.625^\circ$  grid for visibility. The observations have been filtered as described in Sect. 2.1. The center and bottom rows show the differences between methane dry column mixing ratios ( $X_{CH_4}$ ) observed by TROPOMI+GOSAT and simulated by GEOS-Chem with prior emissions (including wetland emissions averaged across WetCHARTs and LPJ-MERRA2) and posterior emissions (median of the inversion ensemble) for each season.

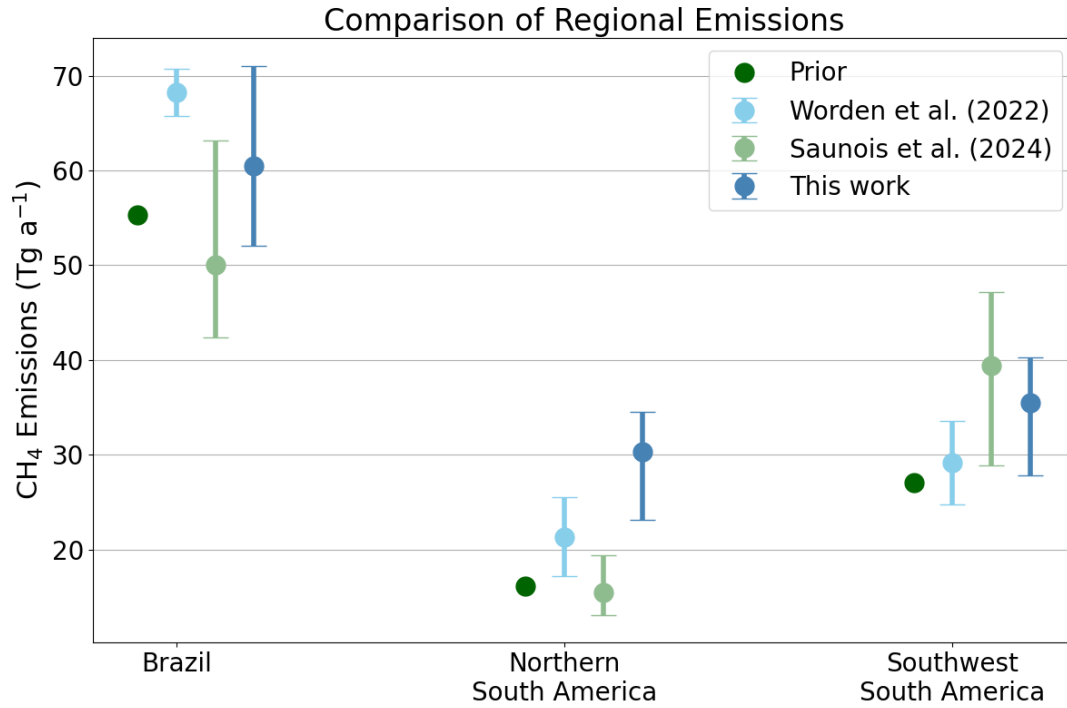

**Figure S2:** Regional methane emissions from Brazil, Northern South America (Colombia, French Guiana, Guyana, Suriname, and Venezuela), and Southwest South America (Argentina, Bolivia, Chile, Ecuador, Peru, Paraguay, and Uruguay). Posterior estimates from our work are compared to our prior estimates, to 2019 emissions from a GOSAT inversion reported by Worden et al. (2022), and to a range of top-down estimates for 2021 from Saunois et al. (2024). Vertical bars are reported uncertainty ranges for total emissions (Worden et al.), ranges across top-down estimates (Saunois et al.), and ranges across the inversion ensemble (this work).

**Table S1: Sources for countries' UNFCCC totals by sector<sup>a</sup> (Gg a<sup>-1</sup>)**

| Country   | Report Type <sup>b</sup> | Report Year | Emission year | Source <sup>c</sup> | GWP (if used)                            | Enteric Fermentation                                              | Manure Management                                           | Landfills                                                    | Wastewater                                                  | Rice                                                            | Link to report                                                                        |
|-----------|--------------------------|-------------|---------------|---------------------|------------------------------------------|-------------------------------------------------------------------|-------------------------------------------------------------|--------------------------------------------------------------|-------------------------------------------------------------|-----------------------------------------------------------------|---------------------------------------------------------------------------------------|
| Argentina | BUR 4                    | 2022        | 2018          | Report              | <b>21</b><br><i>Capítulo 2, pg. 129</i>  | <b>2644.52 CH<sub>4</sub></b><br><i>Table 2, pg. 174</i>          | <b>81.58 CH<sub>4</sub></b><br><i>Table 2, pg. 174</i>      | <b>9639.35 CO<sub>2</sub>e</b><br><i>Tabla 2, pg. 22</i>     | <b>5770.29 CO<sub>2</sub>e</b><br><i>Tabla 2, pg. 22</i>    | <b>17.52 CH<sub>4</sub></b><br><i>Table 2, pg. 176</i>          | <a href="https://unfccc.int/documents/419772">https://unfccc.int/documents/419772</a> |
| Bolivia   | NC 3                     | 2020        | 2008          | Report              | <b>23</b><br><i>Tabla 18, pg. 115</i>    | <b>12467 CO<sub>2</sub>e</b><br><i>Tabla 32, pg. 142</i>          | <b>527.17 CO<sub>2</sub>e</b><br><i>Tabla 32, pg. 142</i>   | <b>1176.2 CO<sub>2</sub>e</b><br><i>Tabla 32, pg. 142</i>    | <b>828.82 CO<sub>2</sub>e</b><br><i>Tabla 32, pg. 142</i>   | <b>393.77 CO<sub>2</sub>e</b><br><i>Tabla 32, pg. 142</i>       | <a href="https://unfccc.int/documents/257158">https://unfccc.int/documents/257158</a> |
| Brazil    |                          | 2020        | 2016          | Data portal         |                                          |                                                                   |                                                             |                                                              |                                                             |                                                                 |                                                                                       |
| Chile     | BUR 5                    | 2022        | 2020          | Report              |                                          | <b>177 CH<sub>4</sub></b><br><i>Capítulo 2, pg. 62</i>            | <b>53.7 CH<sub>4</sub></b><br><i>Capítulo 2, pg. 62</i>     | <b>233.9 CH<sub>4</sub></b><br><i>Capítulo 2, pg. 62</i>     | <b>53.7 CH<sub>4</sub></b><br><i>Capítulo 2, pg. 63</i>     | <b>7.7 CH<sub>4</sub></b><br><i>Capítulo 2, pg. 62</i>          | <a href="https://unfccc.int/documents/624735">https://unfccc.int/documents/624735</a> |
| Colombia  | BUR 3                    | 2022        | 2018          | Report              | <b>28</b><br><i>Tabla 1-5, pg. 50</i>    | <b>42303.01 CO<sub>2</sub>e</b><br><i>Tabla 2-1, pg. 101</i>      | <b>1883.51 CO<sub>2</sub>e</b><br><i>Tabla 2-1, pg. 101</i> | <b>10636.94 CO<sub>2</sub>e</b><br><i>Tabla 2-1, pg. 105</i> | <b>8578.42 CO<sub>2</sub>e</b><br><i>Tabla 2-1, pg. 106</i> | <b>828.75 CO<sub>2</sub>e</b><br><i>Tabla 2-1, pg. 105</i>      | <a href="https://unfccc.int/documents/510821">https://unfccc.int/documents/510821</a> |
| Ecuador   | BUR 2                    | 2023        | 2018          | Report              | <b>25</b><br><i>Tabla 1, pg. 12</i>      | <b>9572.64 CO<sub>2</sub>e</b><br><i>Section 11.3.2.1, pg. 38</i> | <b>9.59 CH<sub>4</sub></b><br><i>Tabla 5, pg.20</i>         | <b>66 CH<sub>4</sub></b><br><i>Tabla 5, pg.20</i>            | <b>27.08 CH<sub>4</sub></b><br><i>Tabla 5, pg.20</i>        | <b>430.27 CO<sub>2</sub>e</b><br><i>Section 11.3.2.2, pg.39</i> | <a href="https://unfccc.int/documents/626650">https://unfccc.int/documents/626650</a> |
| Guyana    |                          | 2012        | 2004          | Data portal         |                                          |                                                                   |                                                             |                                                              |                                                             | -                                                               |                                                                                       |
| Paraguay  |                          | 2022        | 2017          | Data portal         |                                          |                                                                   |                                                             |                                                              |                                                             | -                                                               |                                                                                       |
| Peru      | BUR 2                    | 2019        | 2014          | Report              | <b>21</b><br><i>Footnote 11, pg. 13</i>  | <b>9316.9 CO<sub>2</sub>e</b><br><i>Anexo III, pg. 316</i>        | <b>305.13 CO<sub>2</sub>e</b><br><i>Anexo III, pg. 316</i>  | <b>6439.12 CO<sub>2</sub>e</b><br><i>Anexo III, pg. 316</i>  | <b>2653.27 CO<sub>2</sub>e</b><br><i>Tabla N° 4, pg. 50</i> | <b>1134.04 CO<sub>2</sub>e</b><br><i>Anexo III, pg. 316</i>     | <a href="https://unfccc.int/documents/209403">https://unfccc.int/documents/209403</a> |
| Suriname  | NC 3                     | 2023        | 2017          | Report              | <b>21</b><br><i>Section 3.2, pg. 117</i> | <b>49.2 CO<sub>2</sub>e</b><br><i>Figure 41, pg. 144</i>          | <b>7.4 CO<sub>2</sub>e</b><br><i>Figure 41, pg. 144</i>     | <b>1.576 CH<sub>4</sub></b><br><i>Table 40, pg. 154</i>      | <b>2.375 CH<sub>4</sub></b><br><i>Table 40, pg. 154</i>     | <b>241.1 CO<sub>2</sub>e</b><br><i>Figure 41, pg. 144</i>       | <a href="https://unfccc.int/documents/627964">https://unfccc.int/documents/627964</a> |
| Uruguay   |                          | 2022        | 2019          | Data portal         |                                          |                                                                   |                                                             |                                                              |                                                             |                                                                 |                                                                                       |
| Venezuela | NC 2                     | 2018        | 2010          | Report              |                                          | <b>850 CH<sub>4</sub></b><br><i>Capítulo 2, pg. 161</i>           | <b>37 CH<sub>4</sub></b><br><i>Capítulo 2, pg. 161</i>      | <b>213 CH<sub>4</sub></b><br><i>Capítulo 2, pg. 179</i>      | <b>45 CH<sub>4</sub></b><br><i>Capítulo 2, pg. 179</i>      | <b>19 CH<sub>4</sub></b><br><i>Capítulo 2, pg. 179</i>          | <a href="https://unfccc.int/documents/89289">https://unfccc.int/documents/89289</a>   |

<sup>a</sup> All totals are given either in Gg a<sup>-1</sup> CH<sub>4</sub> or Gg a<sup>-1</sup> CO<sub>2</sub>-equivalent (CO<sub>2</sub>e). If any totals from a report are given in CO<sub>2</sub>e, the GWP used to convert the total to Gg a<sup>-1</sup> CH<sub>4</sub> is also provided. For each total and GWP value within the table, the numeric value is displayed first in **bold** with the exact source (i.e. *section, page number*) displayed in smaller italic text below.

<sup>b</sup> Reports are either Biennial Update Reports (BURs) or National Communications (NC). The number denotes the indicates the report iteration, with higher values corresponding to more recent submissions.

<sup>c</sup> National sectoral totals for Brazil, Guyana, Paraguay, and Uruguay are from the UNFCCC GHG Data Interface ([https://di.unfccc.int/detailed\\_data\\_by\\_party](https://di.unfccc.int/detailed_data_by_party), last accessed Jan 20, 2023) and can be found in Table 2. All other countries have produced more recent reports that are unavailable in the UNFCCC GHG Data Interface, and thus the numbers are obtained directly from these reports as detailed here.
